# Supplementary material for: Luteolin targets the AGE-RAGE signaling to mitigate inflammation and ferroptosis in chronic atrophic gastritis
Source: publisher site journal article supplement (doi:10.18632/aging.205969), 2024-06-24
Supplement: Supplementary file [file aging-v16i13-205969-supplementary-material-SD1.pdf]

SUPPLEMENTARY FIGURE

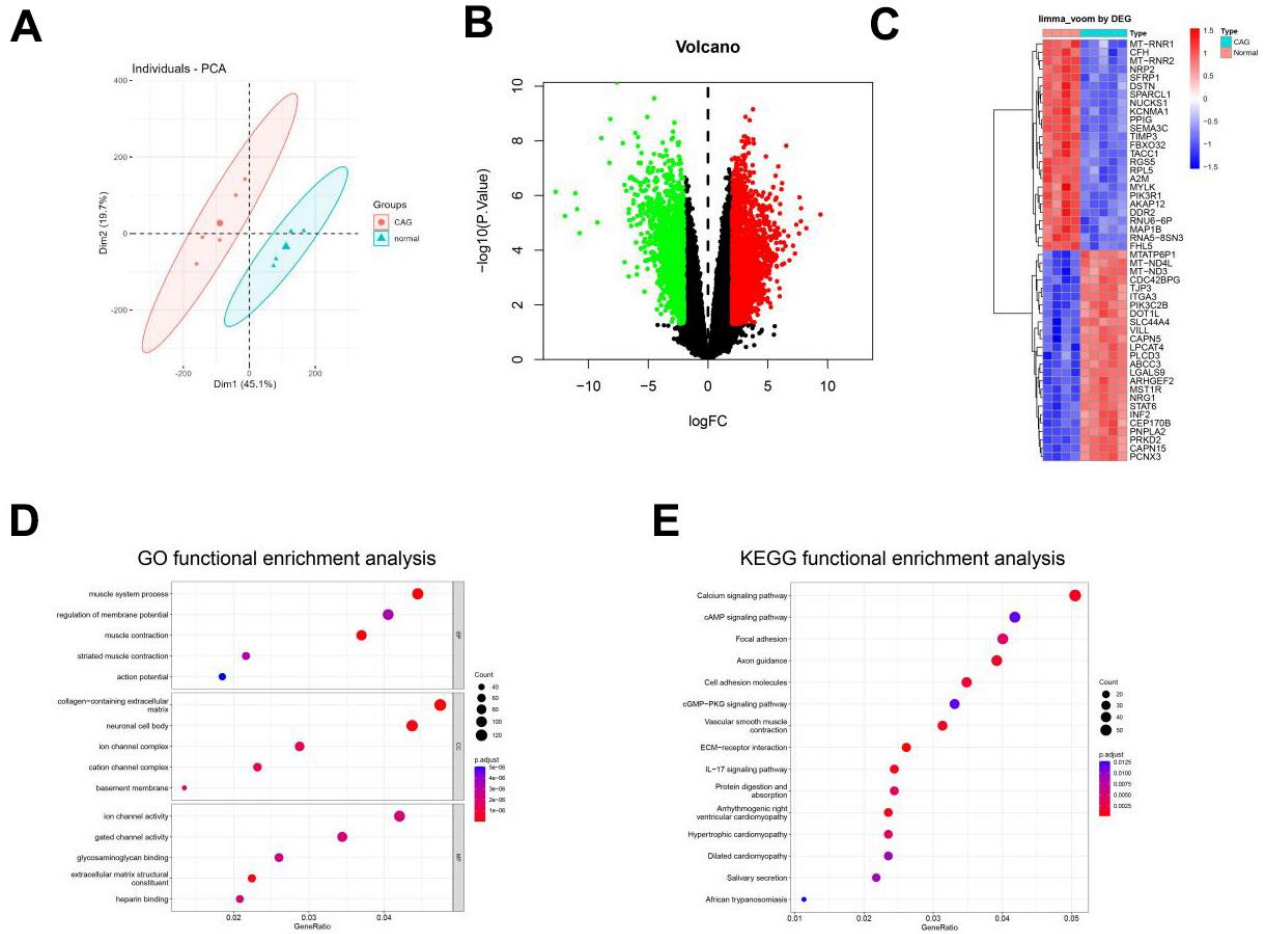

**Supplementary Figure 1. CAG screen for differentially expressed genes.** (A) GSE153224 and GSE191139 datasets were subjected to principal component analysis (PCA) for both sets of samples. (B) Differential genes were plotted in volcano plots. (C) Differential genes were plotted in clustered heat maps. (D) Differential gene GO functional enrichment analysis. (E) Differential gene KEGG functional enrichment analysis.
